# Supplementary material for: Chemical composition of isoprene SOA under acidic and non-acidicconditions: Effect of relative humidity
Source: Copernicus journal article supplement (doi:10.5194/acp-2018-273), 2018-03-19

# Chemical composition of isoprene SOA under acidic and non-acidic conditions: Effect of relative humidity

## Supplementary Information

K. Nestorowicz<sup>1</sup>, M. Jaoui<sup>2</sup>, K. J. Rudzinski<sup>1</sup>, M. Lewandowski<sup>2</sup>, T. Kleindienst<sup>2</sup>, W. Danikiewicz<sup>3</sup> and R. Szmigielski<sup>1</sup>

<sup>1</sup>Environmental Chemistry Group, Institute of Physical Chemistry Polish Academy of Sciences, 01-224 Warsaw, Poland

<sup>2</sup>US Environmental Protection Agency, 109 T.W. Alexander Drive, RTP NC, USA, 27711.

<sup>3</sup>Mass Spectrometry Group, Institute of Organic Chemistry, Polish Academy of Science, 01-224 Warsaw, Poland

Correspondence to: Rafal Szmigielski ([ralf@ichf.edu.pl](mailto:ralf@ichf.edu.pl)); Mohammed Jaoui ([jaoui.mohammed@epa.gov](mailto:jaoui.mohammed@epa.gov))

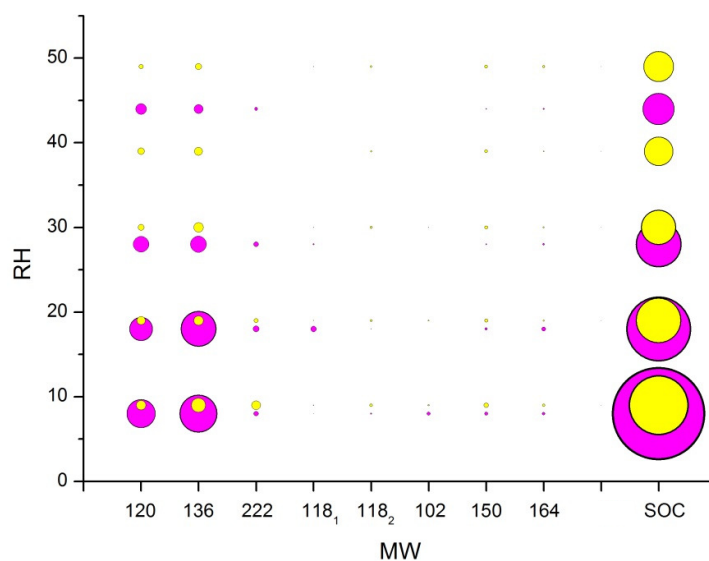

**Figure S1.** Relative amounts of aerosol components detected with GC-MS acidic seed (pink) and non-acidic seed (yellow) experiments (the areas of the circles are proportional to the estimated mass concentrations of compounds).

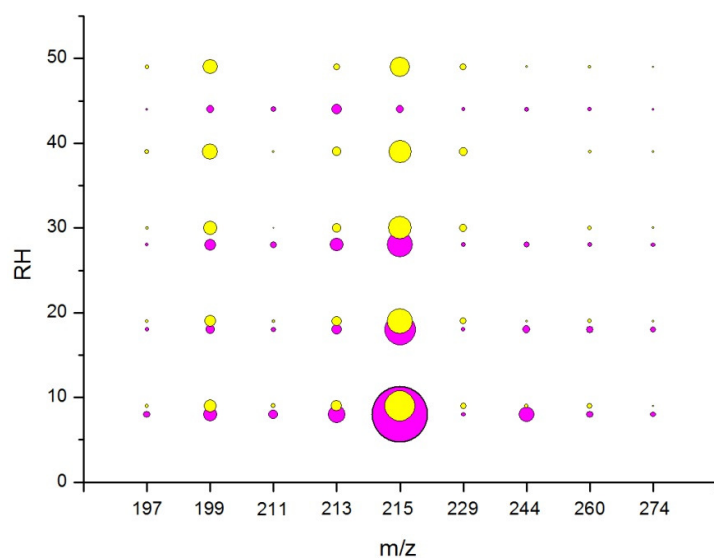

**Figure S2.** Relative abundances of aerosol components detected with LC-MS in acidic seed (pink) and non-acidic seed (yellow) experiments (the areas of the circles are proportional to relative abundances of compounds detected).

**Table S1.** Comparison of product yields in acidic seed experiments vs. non-acidic seed experiments at various RH levels ( > higher, = equal and lower < )

| Product                        | MW  | <i>m/z</i> | RH = 8<br>– 9 | RH = 18 –<br>20 | RH = 28<br>– 30 | RH = 39 –<br>49 |
|--------------------------------|-----|------------|---------------|-----------------|-----------------|-----------------|
| 2-methylglyceric acid          | 120 |            | >             |                 |                 |                 |
| 2-methyltetrol OS              |     | 244        | >             |                 |                 |                 |
| 2-methylthreonic acid NOS      |     | 274        | >             |                 |                 |                 |
| furanone OS                    |     | 211        | >             |                 |                 |                 |
| 2-methyltetrols                | 136 |            | >             |                 |                 |                 |
| 2-methyltetrol NOS             |     | 260        | >             |                 |                 | =               |
| furanetriol OS                 |     | 213        | >             | =               |                 |                 |
| 2-methyltetrol OS              |     | 215        | >             | =               |                 |                 |
| IEPOX-1                        | 118 |            | =             | >               | =               |                 |
| dimer of 2-methylglyceric acid | 222 |            | <             | >               |                 |                 |
| C5-diol                        | 102 |            | >             | <               | =               |                 |
| IEPOX OS                       |     | 197        | >             | =               |                 | <               |
| 2-methylglyceric acid OS       |     | 199        | =             | <               |                 |                 |
| IEPOX-2                        | 118 |            | <             |                 |                 |                 |
| 2-methylthreonic acid OS       |     | 229        | <             |                 |                 |                 |

**Figure S3.** Concentrations or relative abundances of some compounds in acidic seed experiments (blue) and non-acidic seed experiments (red) – influence of Relative Humidity

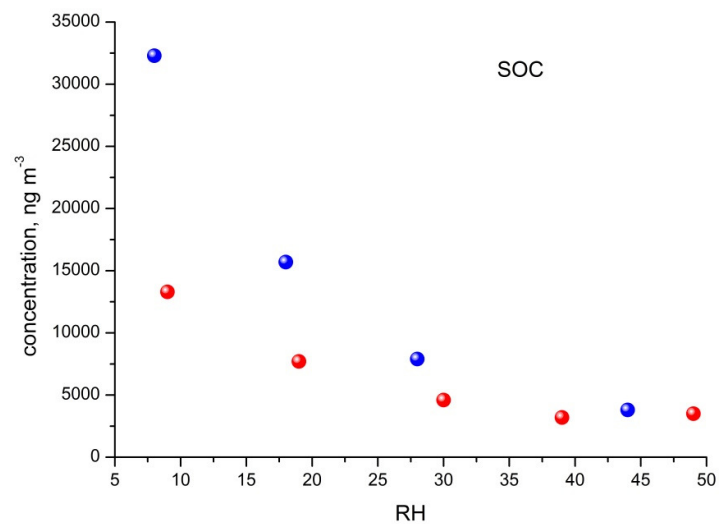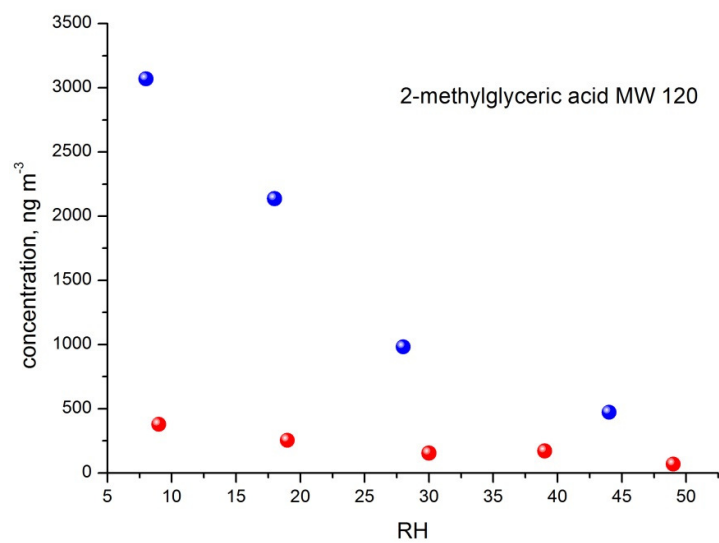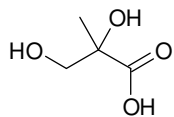

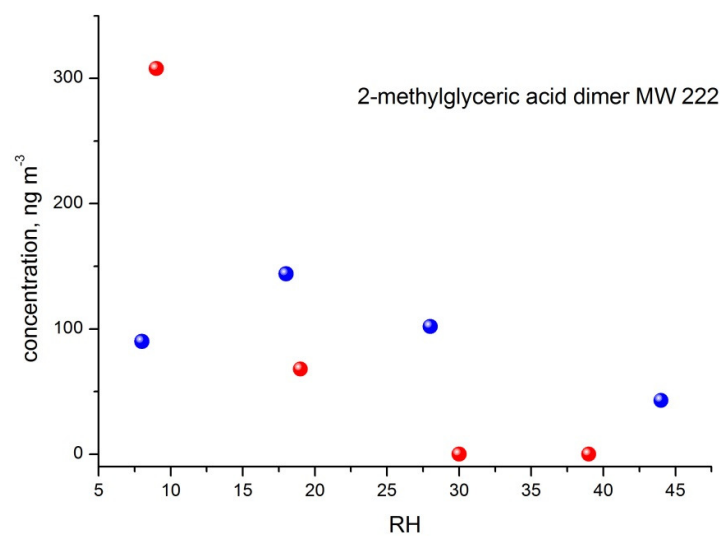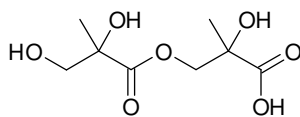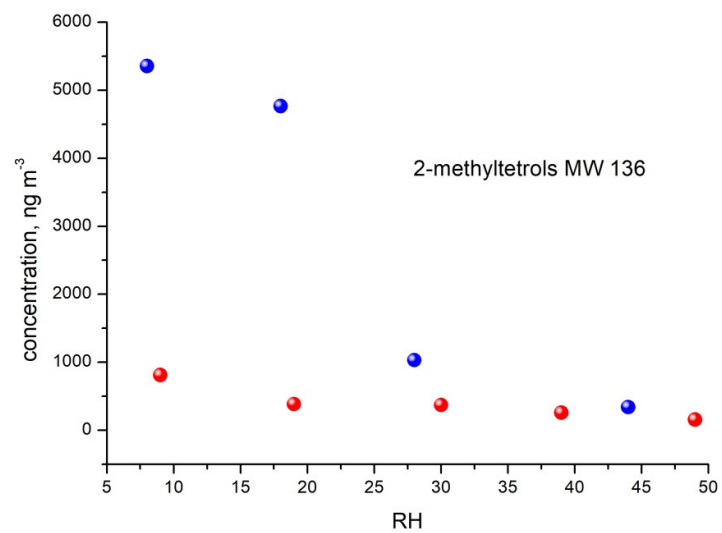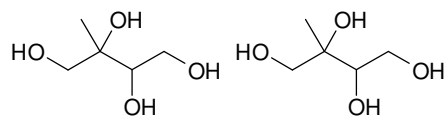

2-methylthreitol (left) and 2-methylerythritol (right)

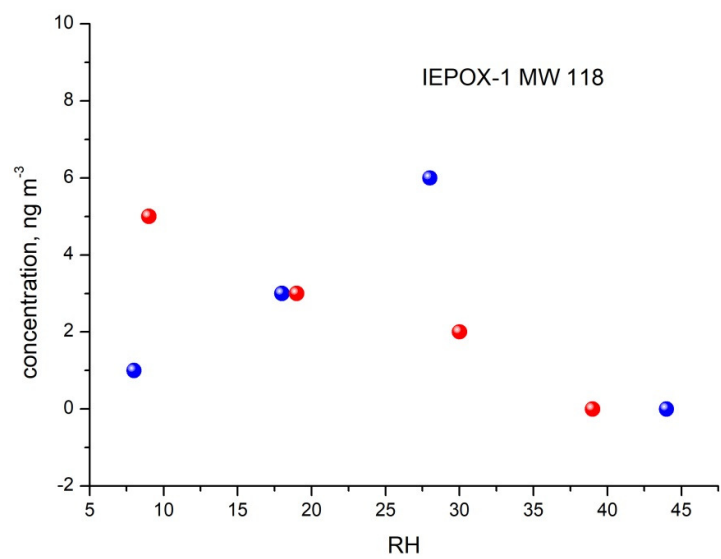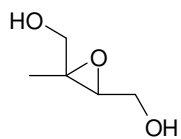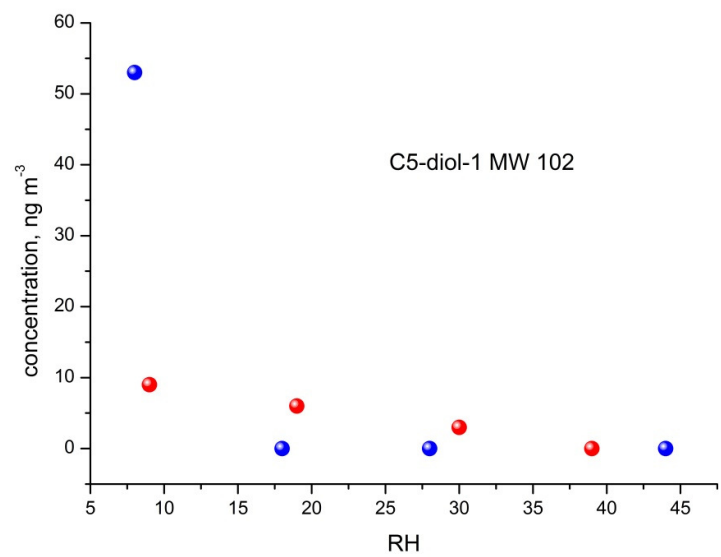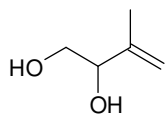

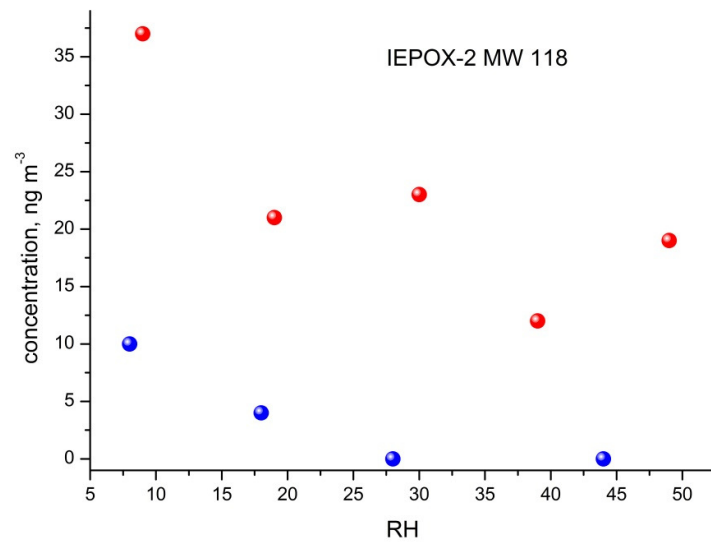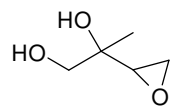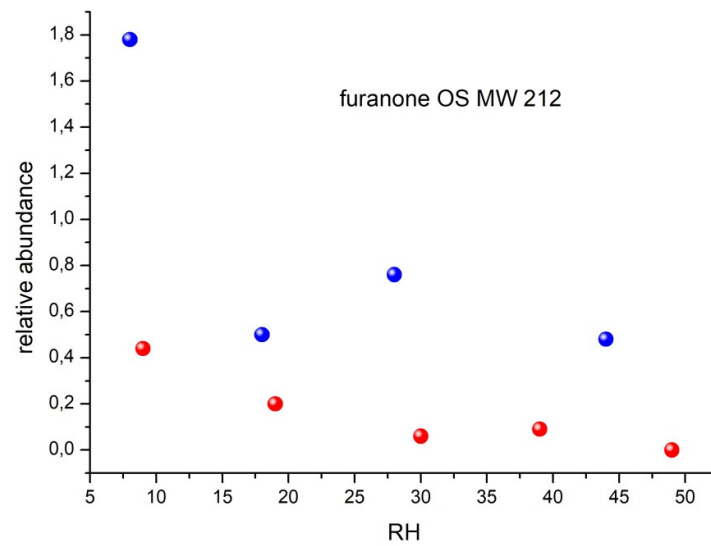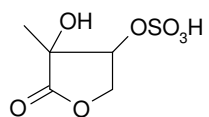

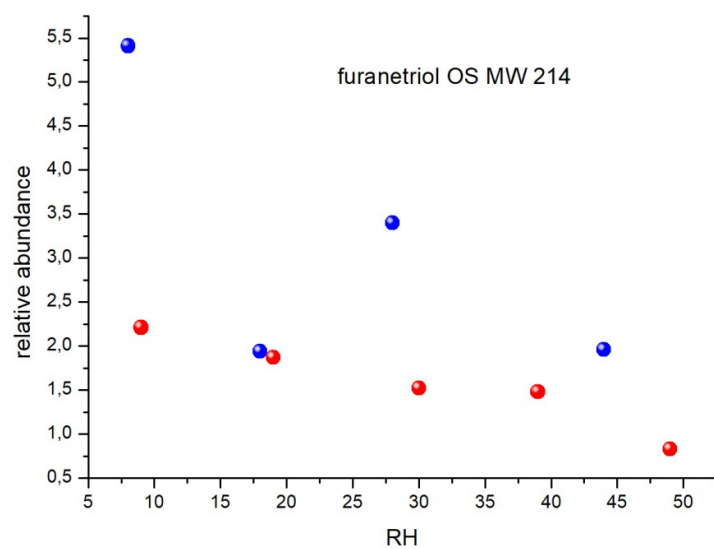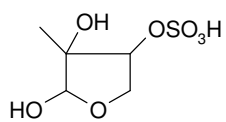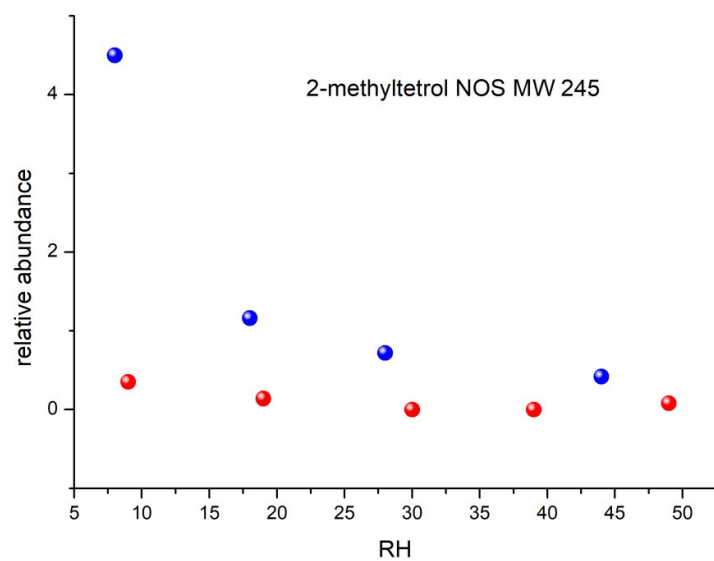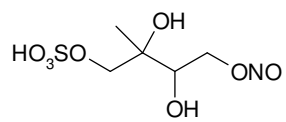

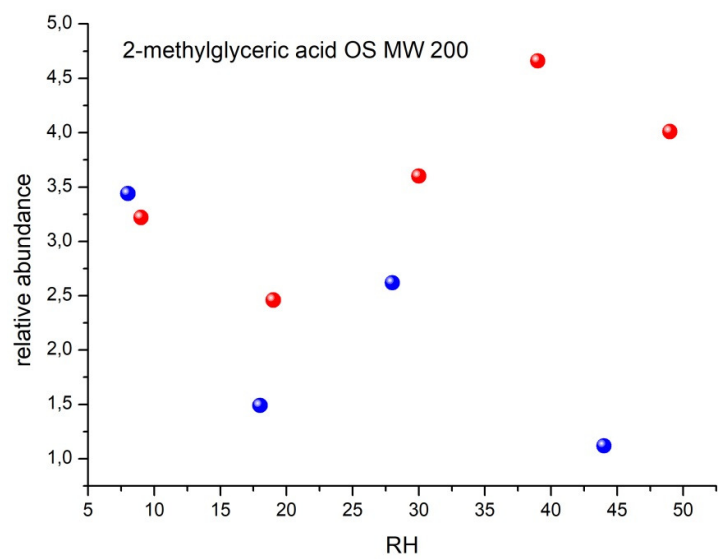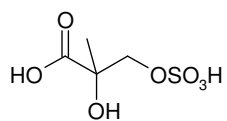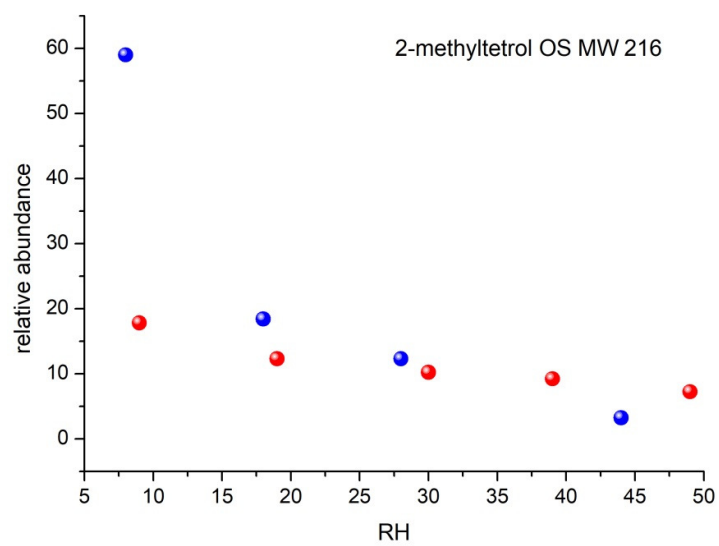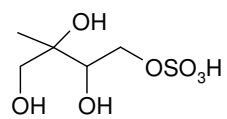



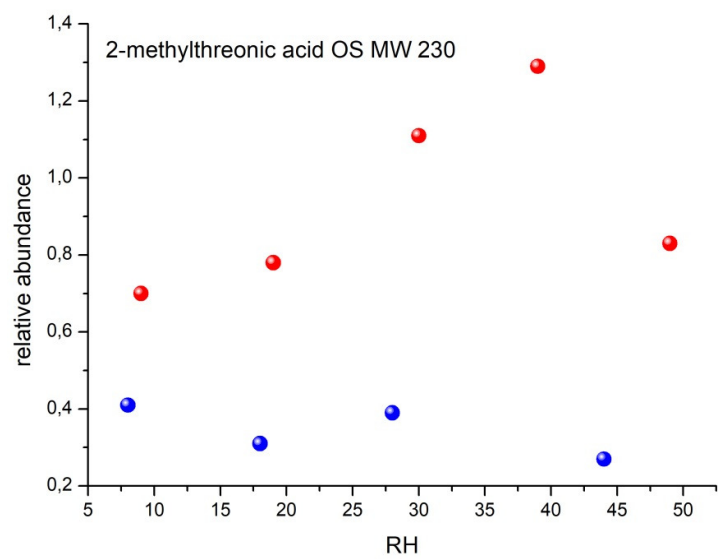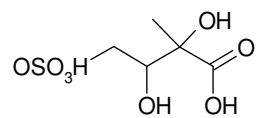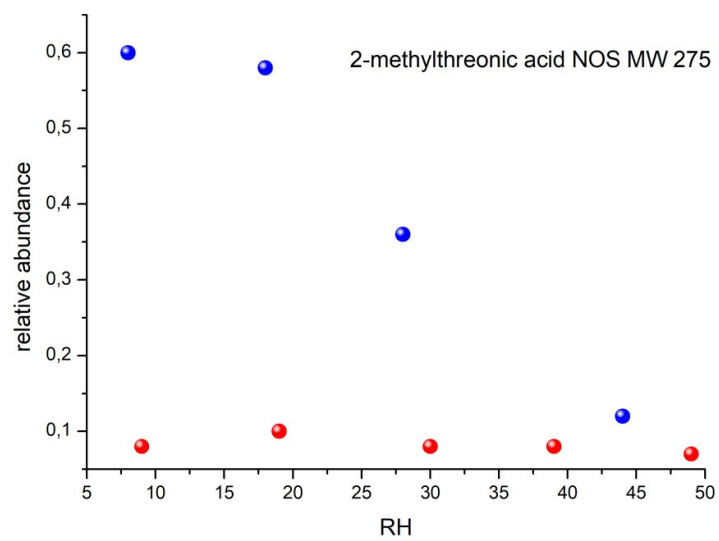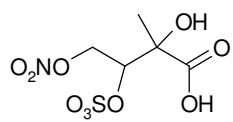

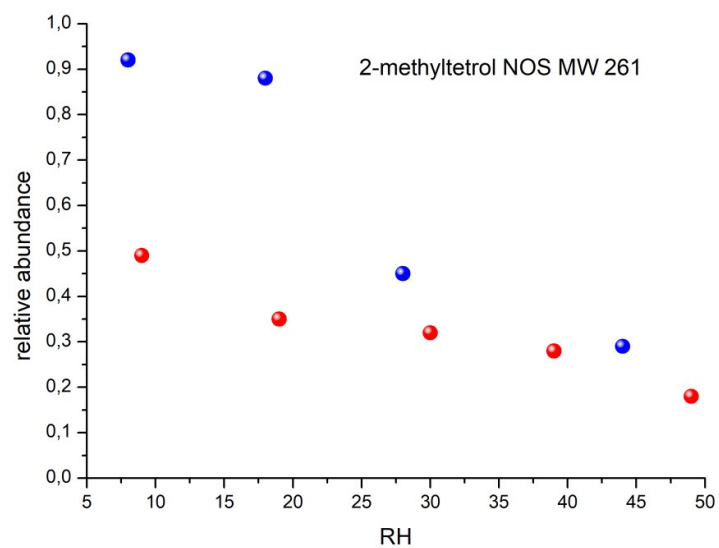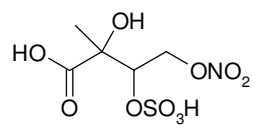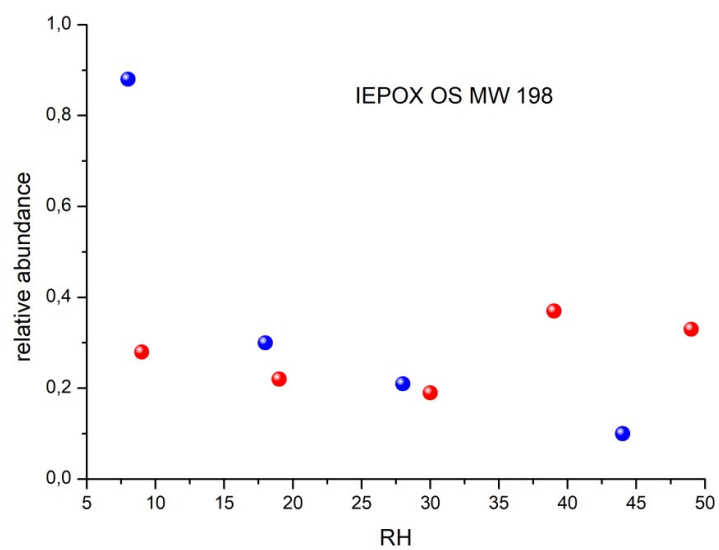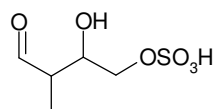

**Figure S4.** Extracted Ion Chromatograms (EIC) of selected components detected in the respective filter extracts from smog chamber ISO SOA (ER667 – non-acidic seed aerosol; ER662 – acidic seed aerosol) and PM<sub>2.5</sub> ambient summer aerosol from Godow and Zielonka sites.

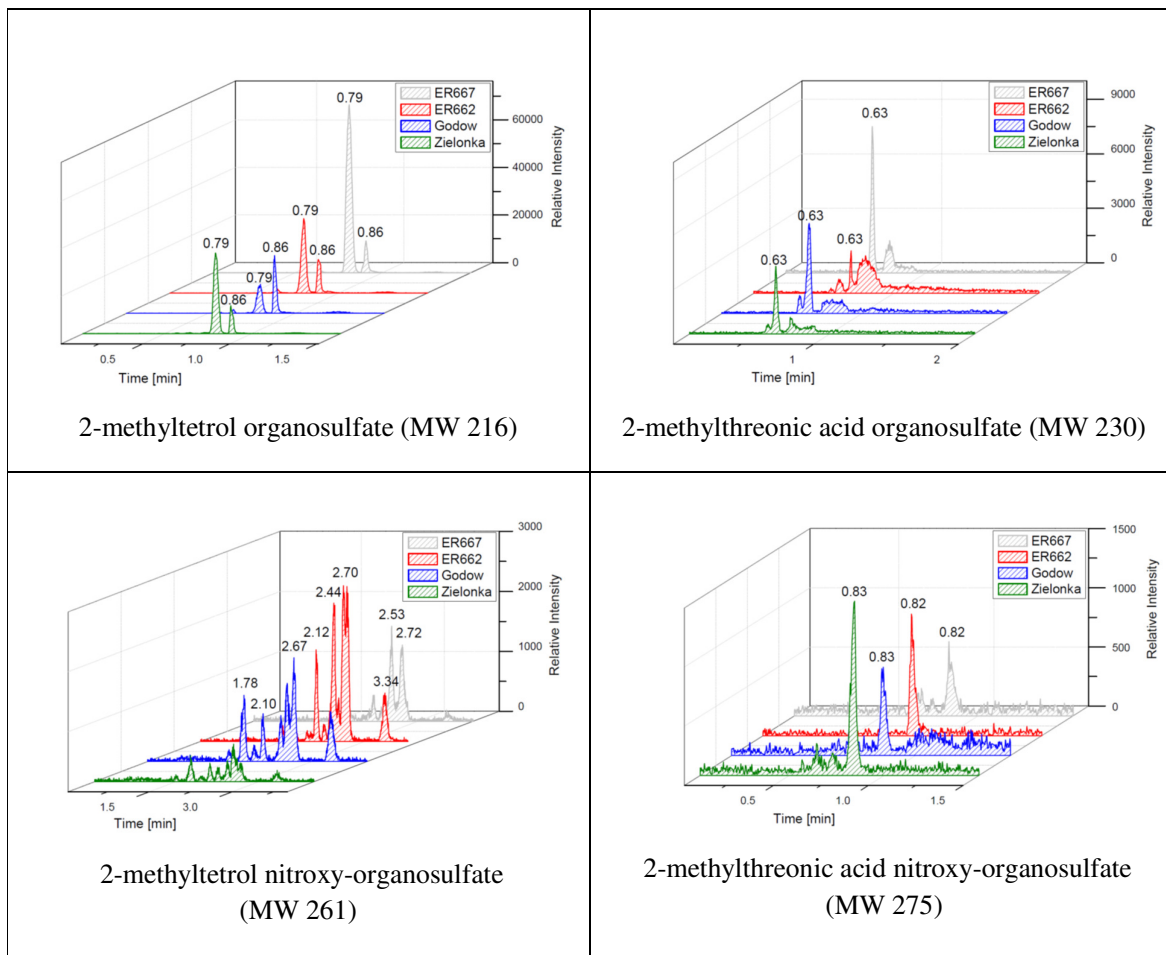

Supplement: Supplementary file [file acp-2018-273-AC6-supplement.pdf]
